# Supplementary material for: Environmental trends of metals and PCDD/Fs around a cement plant after alternative fuel implementation: human health risk assessment
Source: Royal Society of Chemistry journal article supplement (doi:10.1039/c7em00121e), 2017-01-01
Supplement: c7em00121e1.pdf [file c7em00121e1.pdf]

## SUPPORTING INFORMATION

Table 1. Mean recoveries and standard deviation (%) of individual PCDD/Fs in soil, herbage and air samples.

|                             | MEAN ± SD |         |         |
|-----------------------------|-----------|---------|---------|
|                             | SOIL      | HERBAGE | AIR     |
| 13C-2,3,7,8-TCDD (%)        | 82 ± 13   | 58 ± 19 | 78 ± 10 |
| 13C-1,2,3,7,8-PeCDD (%)     | 99 ± 20   | 52 ± 15 | 85 ± 11 |
| 13C-1,2,3,4,7,8-HxCDD (%)   | 86 ± 16   | 81 ± 21 | 85 ± 9  |
| 13C-1,2,3,6,7,8-HxCDD (%)   | 94 ± 15   | 65 ± 21 | 78 ± 9  |
| 13C-1,2,3,4,6,7,8-HpCDD (%) | 99 ± 19   | 62 ± 16 | 96 ± 15 |
| 13C-OCDD (%)                | 75 ± 14   | 29 ± 16 | 79 ± 24 |
| 13C-2,3,7,8-TCDF (%)        | 108 ± 21  | 63 ± 16 | 92 ± 11 |
| 13C-1,2,3,7,8-PeCDF (%)     | 103 ± 19  | 53 ± 14 | 87 ± 12 |
| 13C-2,3,4,7,8-PeCDF (%)     | 107 ± 19  | 52 ± 16 | 59 ± 9  |
| 13C-1,2,3,4,7,8-HxCDF (%)   | 101 ± 24  | 76 ± 24 | 54 ± 7  |
| 13C-1,2,3,6,7,8-HxCDF (%)   | 103 ± 20  | 62 ± 20 | 81 ± 13 |
| 13C-2,3,4,6,7,8-HxCDF (%)   | 104 ± 18  | 79 ± 30 | 74 ± 12 |
| 13C-1,2,3,7,8,9-HxCDF (%)   | 105 ± 20  | 85 ± 44 | 86 ± 12 |
| 13C-1,2,3,4,6,7,8-HpCDF (%) | 115 ± 31  | 58 ± 18 | 78 ± 10 |
| 13C-1,2,3,4,7,8,9-HpCDF (%) | 96 ± 30   | 22 ± 21 | 85 ± 11 |
| 13C-OCDF (%)                | 83 ± 26   | 15 ± 7  | 85 ± 9  |

Levels of metals in samples collected in the current survey (June 2015) performed 4 years after alternative fuel implementation (AFI) and of those obtained in previous surveys before (July 2011) and after (June 2013) fuel implementation. Samples were collected in the area under potential influence of the facility, as well as in two background areas (with traffic (B+T) and no traffic impact (B)). Concentrations in background areas (B+T and B) were calculated as mean values of the three studies.

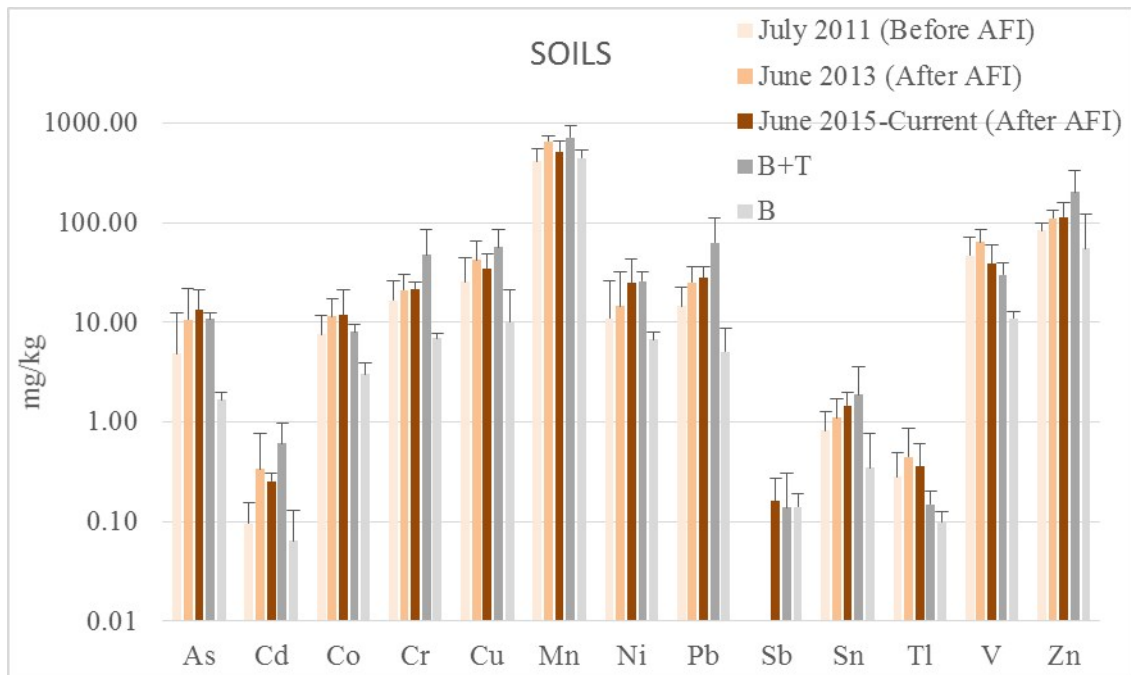

Figure 1. Levels of metals in soils.

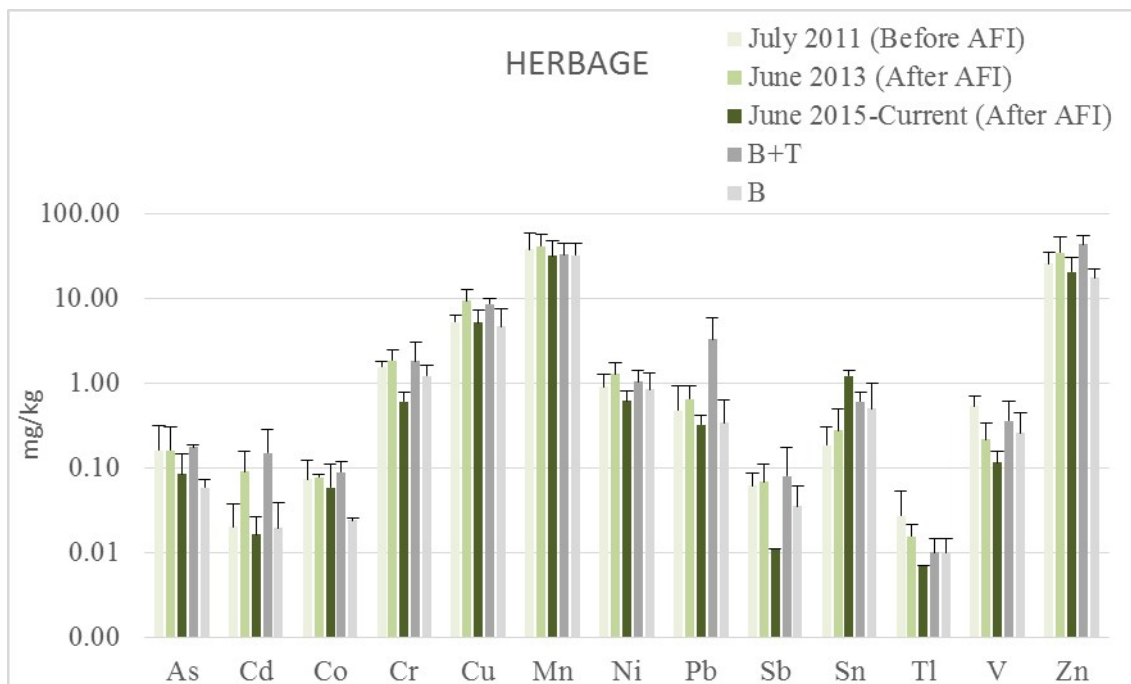

Figure 2. Levels of metals in herbage.

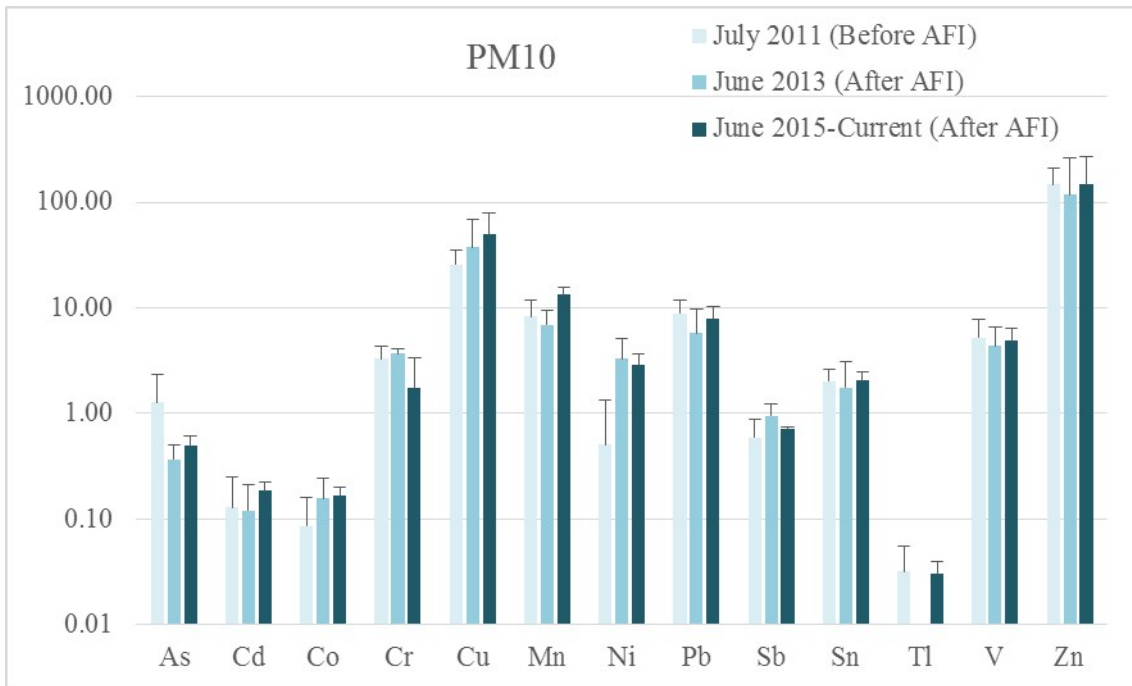

Figure 3. Levels of metals in PM10.

PCDD/Fs in samples collected around the cement plant in the current survey (June 2015) 4 years after alternative fuel implementation (AFI) together with those obtained in previous surveys before (July 2011) and after (June 2013) fuel implementation. Concentrations in background areas (B+T and B) were calculated as mean values of the three studies.

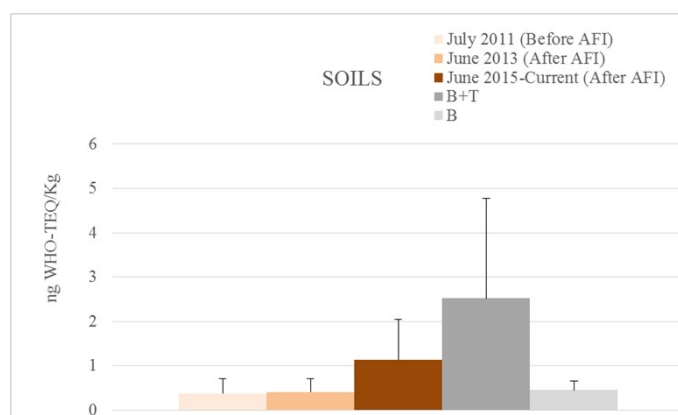

Figure 4. Levels of PCDD/Fs in soils.

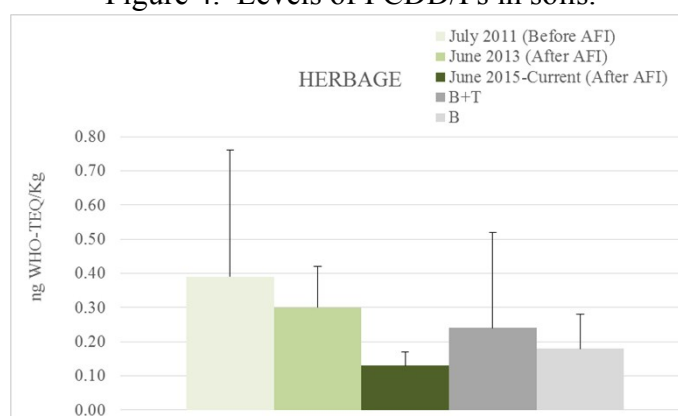

Figure 5. Levels of PCDD/Fs in herbage.

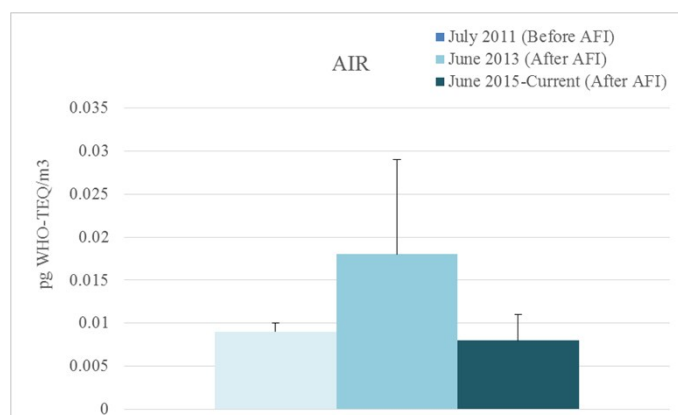

Figure 6. Levels of PCDD/Fs in air.
